# Supplementary material for: A Guide to Molecular Characterization of Genotype II African Swine Fever Virus: Essential and Alternative Genome Markers
Source: MDPI journal article supplement (doi:10.3390/microorganisms11030642), 2023-03-02
Supplement: s1 [file s1]

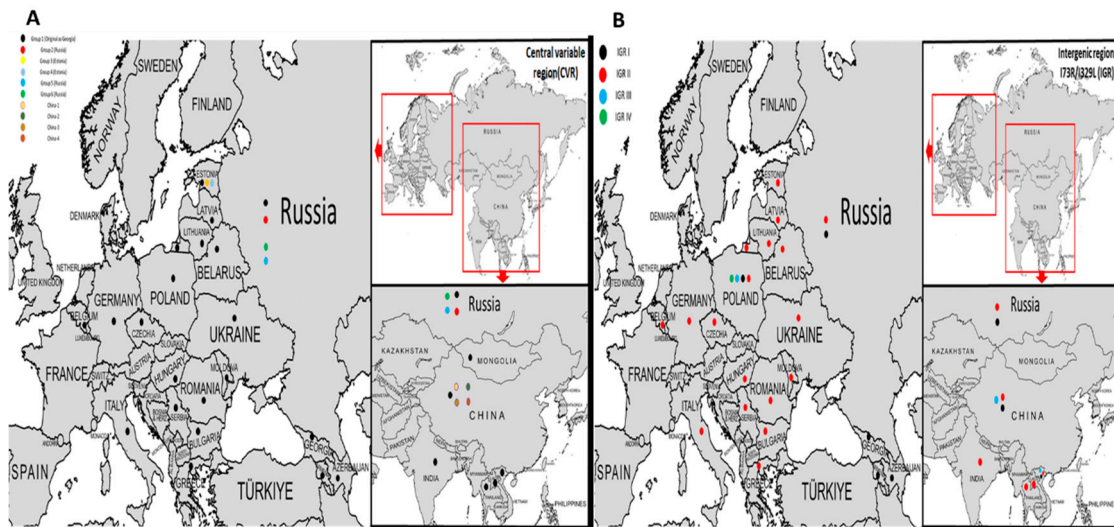

**Supplementary Figure S1.** Geographic distribution of ASFV variants in Europe and Asia based on the partial sequencing of CVR (B602L gene)—(A), and the Intergenic region I73R/I329L (IGR)—(B). Number and size of dots do not reflect the number of outbreaks.

**Supplementary Table S1.** List of 24 ASFV isolates used in the phylogenetic analysis to confirm the respective genotypes.

| Accession number | Isolate name   | Country                 | Genotype |
|------------------|----------------|-------------------------|----------|
| DQ250114         | SPEC-205       | Namibia                 | I        |
| FR682468.2       | Georgia 2007/1 | Georgia                 | II       |
| DQ250120         | SPEC/257       | South Africa            | III      |
| AF449477         | RSA 1/1999     | Thabazimbi/South Africa | IV       |
| AF270708         | Tete           | Mozambique              | V        |
| AF270710         | SPEC-265       | Mozambique              | VI       |
| AF302818         | RSA 1/1998     | South Africa            | VII      |
| AF270705         | Tete-1         | Mozambique              | VIII     |
| MH025916         | R8             | Uganda                  | IX       |
| AF449463         | BUR-1          | Burundi                 | X        |
| AY351522         | KAB            | Zambia                  | XI       |

|          |              |                   |       |
|----------|--------------|-------------------|-------|
| AY351543 | MZI-921      | Malawi            | XII   |
| AY351542 | SUM-1441     | Zambia            | XIII  |
| AY351555 | NYA          | Zambia            | XIV   |
| AY494552 | Tan-1        | Tanzania          | XV    |
| AY494551 | Tan-2        | Tanzania          | XVI   |
| DQ250119 | Zim-1        | Zimbabwe          | XVII  |
| DQ250122 | NAM 1/1995   | Windhoek, Namibia | XVIII |
| DQ250127 | 3-Pienaars   | South Africa      | XIX   |
| DQ250109 | Lillie       | South Africa      | XX    |
| DQ250125 | 1-Gravelotte | South Africa      | XXI   |
| DQ250117 | SPEC-245     | South Africa      | XXII  |
| KT795360 | ETH-3        | Ethiopia          | XXIII |
| KY353989 | Moz10        | Mozambique        | XXIV  |

**Supplementary Table S2. Primer sequences previously described for the amplification and sequencing of ASFV genotype II markers.**

| Marker                             | Primer  | Sequence (5'–3')                | Position        | Fragment length (bp) | Reference |
|------------------------------------|---------|---------------------------------|-----------------|----------------------|-----------|
| B646L (genotyping)                 | P72-F   | GGCACAAGTTCGGACATGT             | 104,581–104,599 | 478                  | [4]       |
|                                    | P72-R   | GTACTGTAACGCAGCACAG             | 105,040–105,058 |                      |           |
| CVR of B602L gene                  | CVR-Fwd | AAGCTCATTAGGCACATTTAATGTTTTT GC | 102,591–102,621 | 459                  | [30]      |
|                                    | CVR-Rvs | CTGCAGGAATGGATGCCTTC            | 103,030–103,049 |                      |           |
| Intergenic region I73R/I329L (IGR) | ECO1A   | CCATTTATCCCCGCTTTGG             | 172,272–172,291 | 356                  | [30]      |
|                                    | ECO1B   | TCGTCATCCTGAGACAGCAG            | 172,608–172,627 |                      |           |
|                                    | IGR-F   | CTC AGA ACT TTT TGA GAA GAT TG  | 172,236–172,258 | 349                  | [36]      |

|                                         |                      |                            |                     |     |               |
|-----------------------------------------|----------------------|----------------------------|---------------------|-----|---------------|
|                                         | IGR-R                | CAG CAA ACA GTC CTA TTG TT | 172,585–<br>172,566 |     |               |
| Intergenic<br>region MGF-<br>505 9R/10R | MGF-<br>Fwd          | AGAAACCGCAGATGAATGTA       | 45,079–<br>45,098   | 552 | [38]          |
|                                         | MGF-<br>Rvs          | TACAGCCCTAGTTGTTGAAG       | 45,611–<br>45,630   |     |               |
| Intergenic<br>region<br>A179L/A137R     | Forward              | CCATAGCGGCACCCTATATT       | 55,295–<br>55,314   | 270 | [39]          |
|                                         | Reverse              | CCTCCTGGTCGAGTTTGTA        | 55,545–<br>55,564   |     |               |
| K145R                                   | K145R-<br>Fwd        | TTTCAGGCTGAAAACCTTTTAT     | 66,015–<br>66,036   | 283 | This<br>study |
|                                         | K145R-<br>Rvs        | AAAGTTTTCAATGGTTGTTAGC     | 66,276–<br>66,297   |     |               |
| O174L                                   | O174L-<br>Fwd        | TGGCTCAGACGATATTTCAACTC    | 129,152–<br>129,174 | 673 | [36]          |
|                                         | O174L-<br>Rvs        | GCCTCCACCACTTGAACCAT       | 129,805–<br>129,824 |     |               |
| MGF-505-5R                              | MGF-<br>505-5R-F     | TACGCTTCTTTTCAATCATCAT     | 38,942–<br>38,963   | 641 | [36]          |
|                                         | MGF-<br>505-5R-<br>R | AAATTAACAGTTGTTTGCCTTC     | 39,561–<br>39,582   |     |               |
| I267L                                   | I267L-<br>Fwd        | TTGGACAAATTGCGTTGCGA       | 170,704–<br>170,723 | 337 | This<br>study |
|                                         | I267L-<br>Rvs        | AAATGCGACCGTCCAGAACT       | 171,021–<br>171,040 |     |               |
